# Supplementary material
Source: PubMed Central journal article supplement (PMC137888)
Supplement: pnas_212527699_5.pdf [file pnas_212527699_5.pdf]

Hosa NP\_002829 1 11 21 31 41 51 61 71 81 91 101 111 121 131 141  
Mumu\_A28334 \*\*\*\*\*  
Rano\_TDRTLT \*\*\*\*\*  
Gaga\_A54080 \*\*\*\*\*  
Cyca\_BAA92179 \*\*\*\*\*  
Taru\_CAB96212 \*\*\*\*\*  
Hefr\_T43148 \*\*\*\*\*  
Lamprey \*\*\*\*\*  
Xela\_AAA17990 \*\*\*\*\*  
Dare\_NP\_571963 \*\*\*\*\*  
Rano\_AAB28877 \*\*\*\*\*  
Anga\_EAA08408 \*\*\*\*\*  
Drme\_AAF49892 MALLYRRMSM LLNIILAYIF LCAICVQGSV

Hosa NP\_002829 151 161 171 181 191 201 211 221 231 241 251 261 271 281 291  
Mumu\_A28334 FNTITGVSSVQ TPLHPTHADS QTPSA\*GTD TQFSGSAANA KLNPTP\*GSN AISDVPGERS T\*ASTFFPTDP VSPILTTLTSL AHSSAALPA RTSNTTITAN TS\*\*DAYLN ASETTTLSPS GSAVI\*STTTI \*\*ATTPSKP TDEKANYIT  
Rano\_TDRTLT \*\*\*\*GVLSTL LPHLTPQDPS QTPSAGGADT QTFSSQADNP TLTPAPGGGT DDPGVPGER V\*POTIPADT ~AFPVDTPSL ARNSSAASPT HTSNVSTTDI SS\*\*GASLT TLPSTL\*G\*F ASTDPPSTTI \*\*AT\*TKQ TCAAMFGNIT  
Gaga\_A54080 \*\*\*\*GFSSTL MPHLTPQDPS QTPSARGADT QTLSSQADLT TLTAAPSGET DDPGVPBEET V\*\*\*\*\*~P ETPPGGTPL ARNSTAPST HTSNVSTTDI SS\*\*GANLT TPAPSTLG\*F ASNTTSTBEI \*\*ATPQTKP SDEKFGNVT  
Cyca\_BAA92179 \*\*\*\*\*  
Taru\_CAB96212 \*\*\*\*\*  
Hefr\_T43148 \*\*\*\*\*  
Lamprey \*\*\*\*\*  
Xela\_AAA17990 \*\*\*\*\*  
Dare\_NP\_571963 \*\*\*\*\*  
Rano\_AAB28877 PPGFNIDMG POLKVVVERT TATMLCAASG NDPPEITQFK DFLPVD\*PSA SNGRIKQLRS G\*ALQIESSE ETDQGYEVC ATNSGAVRYS SPANLYVRV RV\*\*APRFS ILPMSHEIMP GGMVNTICVA \*\*VGSMPY QKMGGAEDL  
Anga\_EAA08408 QQLY\*VIEAF PLSHTIYVWK EDASGESSLR ALAINNSQFW IDERHV\*\*N ALL\*LRDLTK GHNQTSYCVV LPSAQMQAAN IYEVKSMALL LLDVPOVTDI YAKAVGANKI YLNTVND\*\* GNDRKNYIV \*\*RYLKTGD VFTYTYREKI  
Drme\_AAF49892 VMLY\*LIEMY PQNETNRNL KWLKDGSGFE FLDTFSSISK LNDTHL\*\*N FTLEFTEVYK KENGTYKCTV PDDTGLEIT\* \*\*SKEITLF VMEVPOVSID FAKAVGANKI YLNTVND\*\* GNDP LQKFFI \*\*TLQEAGT PFTYHKDFI

Hosa NP\_002829 301 311 321 331 341 351 361 371 381 391 401 411 421 431 441  
Mumu\_A28334 VDY\*LYNKET KLFETAKLVN ENVE\*GNNT TNEV\*HNLTE CNAS\*\*VSI SHNSGT\*AP DKTLILDVPP GVEK\*\*\*\*\*  
Rano\_TDRTLT VNY\*\*TYESSN QTFKADLKDV QNAK\*GNEDC EN\*VLNLEE SQOIKN\*ISV SNGS\*AP\*P ATTDILVPP GTDK\*\*\*\*\*  
Gaga\_A54080 VRY\*YDSS QFNANLEGD KKPKE\*YTD EK\*ELKNLPE SQ\*KN\*VTL SNGS\*P\*P DKIIINLDVPP GTHN\*\*\*\*\*  
Cyca\_BAA92179 IDYGNIEEKN NSAEVTLKLN KENRIYDILL EDGSKLSVNA SNNIVM\*LWN CRRYTVQSR S\*VKMYLTIPT DEK\*\*\*\*\*  
Taru\_CAB96212 IDNCNVVGEN HFN\*\*LNVLK SVNHSABPKG WNLTK\*VNI \*\*\*ITTEDS QVQKPIQINL ETCN\*\*\*\*\*  
Hefr\_T43148 LQHS\*IDCNO TVNT\*ATLQP KMEDEFQNVKS SPGS\*ICYQSK WNIRSL\*LTQ PNNMQLRDD TFCIRYDSD ICTN\*\*\*\*\*  
Lamprey KLHTSYKDE NLTITILNSS FALVGGGTAN ISVSLPSSLN CARYTL\*NGT ELVNIITNPS PDLQ\*\*\*\*\*  
Xela\_AAA17990 RWW\*ARGLG\* EMBERRAPFA RCIAV\*CALM LCVSVSHATA QTOAST\*TPS ASPIVS\*\*SA SDQSPMSTLA AEK\*\*\*\*\*  
Dare\_NP\_571963 VI\*\*\*\*\* \*ALLATVLP C SAAENATAVG PT\*\*\*PALN VITRPA\*QQD PPELITNET\* \*\*\*\*\*AASS GEPE\*\*\*\*\*  
Rano\_AAB28877 CP\*\*\*\*\* \*LLELLHVAF VALSTAQTL P QTTKPT\*PHP PTPPLIIVTN GSPTAAPTST PSPQ\*\*\*\*\*  
Anga\_EAA08408 TPEDDMFVGR NVLELTDVDK SAN\*YICVAMS SLGVIEAVAL RTLD\*PSF TPEVEVKSS HSTITIGWAP PPNALTDYIQ GNDPVSYYV IEYKSKSDG PYQIKEDITT TRYPISGGLP NSEYELWISA VNSIQGPPS ESVT\*RTGEQ APASAPRNVQ  
Drme\_AAF49892 GGNS\*YVLD GFEP\*GTDKI SLGASNGQGD SKHHEYSETI IIVKSL\*PKA TILDTD\*PSF TPEVEVKSS HSTITIGWAP PPNALTDYIQ GNDPVSYYV IEYKSKSDG PYQIKEDITT TRYPISGGLP NSEYELWISA VNSIQGPPS ESVT\*RTGEQ APASAPRNVQ  
NGSHTSYILD HFKPNNTYVFL RIVGKNSIGN GQPTQYQGI TTLSYD\*PIF IPKVETGST ASTITIGWNP PPPDLIDYIQ YYELIVSESG BVPKVIEBAI YQ\*QNSRNL YMFDKLKTAT DYEFVRVACS DLTKTC\*GPPS ENVNGTMDG

Hosa NP\_002829 451 461 471 481 491 501 511 521 531 541 551 561 571 581 591  
Mumu\_A28334 IET\*\*FTDDT QNIT\*YRFOCG \*\*\*\*\*  
Rano\_TDRTLT KNLDFRKNQ DNLSYVLHCE \*\*\*\*\*  
Gaga\_A54080 KNK\*\*FTDDI QKISYNFRCT \*\*\*\*\*  
Cyca\_BAA92179 NVT\*\*VSQKT NSNSGGTGN LIGSYE\*\*\*\*  
Taru\_CAB96212 NKP\*\*LSSDN V\*SQCKDFTFK \*\*\*\*\*  
Hefr\_T43148 RLG\*\*VYPEK IETTPPNCX NWTVEH\*\*\*\*  
Lamprey \*TR\*\*GVQTN CKLNYTNCH \*\*\*\*\*  
Xela\_AAA17990 NVNAS\*FCFYS HSGQSDHFN \*\*\*\*\*  
Dare\_NP\_571963 \*\*\*\*\*LKATA PTTT\*TKPAVI L\*\*\*\*\*  
Rano\_AAB28877 \*\*\*\*\*LIATK AFNDS\*EGTAA P\*\*\*\*\*  
Anga\_EAA08408 ARM\*\*LSAT MVQWEEPEVE PNGLIRGYRV YYTEPEBHP GNVQKHNVDD SLLT\*\*TV GSLEDETY VVRLVAF\*TVG DGPLSDPIQ KTOQGVGPG MNLRAEAKSE TISGL\*SWAP RQESVIKYLE LFRFEDGRE VGRTPDPTTA  
Drme\_AAF49892 QAS\*\*APRSL QCTSH\*HNLS \*\*\*\*\*WEVPE PFNGKIMSQ ALLS\*\*GY DNVPNNTV VVVAHTRTK RGPVSAITRK KNGEPATGSC LMPVSTPDAI GRTMWSKVNLD DS\*KYVLKLY LPKISER\*\* \*\*\*\*\*

|                |            |            |            |            |            |            |            |            |            |            |             |             |            |            |            |
|----------------|------------|------------|------------|------------|------------|------------|------------|------------|------------|------------|-------------|-------------|------------|------------|------------|
| Hosa NP_002829 | 601        | 611        | 621        | 631        | 641        | 651        | 661        | 671        | 681        | 691        | 701         | 711         | 721        | 731        | 741        |
| Mumu_A28334    | *****      | *****      | *****      | *****      | *****      | *****      | *****      | *****      | *****      | *****      | *****       | *****       | *****      | *****      | *****      |
| Rano_TDR1LT    | *****      | *****      | *****      | *****      | *****      | *****      | *****      | *****      | *****      | *****      | *****       | *****       | *****      | *****      | *****      |
| Gaga_A54080    | *****      | *****      | *****      | *****      | *****      | *****      | *****      | *****      | *****      | *****      | *****       | *****       | *****      | *****      | *****      |
| Cyca_BAA92179  | *****      | *****      | *****      | *****      | *****      | *****      | *****      | *****      | *****      | *****      | *****       | *****       | *****      | *****      | *****      |
| Taru_CAB96212  | *****      | *****      | *****      | *****      | *****      | *****      | *****      | *****      | *****      | *****      | *****       | *****       | *****      | *****      | *****      |
| Hefr_T43148    | *****      | *****      | *****      | *****      | *****      | *****      | *****      | *****      | *****      | *****      | *****       | *****       | *****      | *****      | *****      |
| Lamprey        | *****      | *****      | *****      | *****      | *****      | *****      | *****      | *****      | *****      | *****      | *****       | *****       | *****      | *****      | *****      |
| Xela_AAA17990  | *****      | *****      | *****      | *****      | *****      | *****      | *****      | *****      | *****      | *****      | *****       | *****       | *****      | *****      | *****      |
| Dare NP_571963 | *****      | *****      | *****      | *****      | *****      | *****      | *****      | *****      | *****      | *****      | *****       | *****       | *****      | *****      | *****      |
| Rano_AAB28877  | FVVEDLKPNT | EYAFRLAARS | PQGLGAFTAV | VRQRTLQAIS | PKNFVKVMIM | KTSVLLSWEF | PDNYSNPTPY | KIQYNGLTLD | VDGRTTKKLI | THLKPHTFYN | FVLVTNRGSSL | GGLLQOTVTAR | T*AFNMLSGK | PSVAPKPDND | GSIVVYLPDG |
| Anga_EAA08408  | *****      | *****      | *****      | *****      | *****      | *****      | *****      | *****      | *****      | *****      | *****       | *****       | *****      | *****      | *****      |
| Drme_AAF49892  | *****      | *****      | *****      | *****      | *****      | *****      | *****      | *****      | *****      | *****      | *****       | *****       | *****      | *****      | *****      |

|                |            |             |            |            |            |            |            |            |            |            |            |             |            |             |             |
|----------------|------------|-------------|------------|------------|------------|------------|------------|------------|------------|------------|------------|-------------|------------|-------------|-------------|
| Hosa NP_002829 | 751        | 761         | 771        | 781        | 791        | 801        | 811        | 821        | 831        | 841        | 851        | 861         | 871        | 881         | 891         |
| Mumu_A28334    | *****      | *****       | *****      | *****      | *****      | *****      | *****      | *****      | *****      | *****      | *****      | *****       | *****      | *****       | *****       |
| Rano_TDR1LT    | *****      | *****       | *****      | *****      | *****      | *****      | *****      | *****      | *****      | *****      | *****      | *****       | *****      | *****       | *****       |
| Gaga_A54080    | *****      | *****       | *****      | *****      | *****      | *****      | *****      | *****      | *****      | *****      | *****      | *****       | *****      | *****       | *****       |
| Cyca_BAA92179  | *****      | *****       | *****      | *****      | *****      | *****      | *****      | *****      | *****      | *****      | *****      | *****       | *****      | *****       | *****       |
| Taru_CAB96212  | *****      | *****       | *****      | *****      | *****      | *****      | *****      | *****      | *****      | *****      | *****      | *****       | *****      | *****       | *****       |
| Hefr_T43148    | *****      | *****       | *****      | *****      | *****      | *****      | *****      | *****      | *****      | *****      | *****      | *****       | *****      | *****       | *****       |
| Lamprey        | *****      | *****       | *****      | *****      | *****      | *****      | *****      | *****      | *****      | *****      | *****      | *****       | *****      | *****       | *****       |
| Xela_AAA17990  | *****      | *****       | *****      | *****      | *****      | *****      | *****      | *****      | *****      | *****      | *****      | *****       | *****      | *****       | *****       |
| Dare NP_571963 | *****      | *****       | *****      | *****      | *****      | *****      | *****      | *****      | *****      | *****      | *****      | *****       | *****      | *****       | *****       |
| Rano_AAB28877  | QSPVTVQNYF | IVMVPVLRK** | *****      | *****      | *****      | SRGG       | QFPILGSPTE | Q**DLEELI  | QDLSRLQRRS | LRHSRQLEVP | RPYIAARFSI | LPAVPHFGNQ  | KQYGGFDNRG | LEPHGRHYVLF | VLAVLQKNPEY |
| Anga_EAA08408  | TYLAEVFAQM | SSQTEVFLGD  | GK***NSPA  | VG***LCPQ  | CLQMR*HRVQ | VEAERAPATT | EL**PAARD  | LPAADDVTA  | PGAR**TONE | AVALE***D  | REKASSNHEK | RDRTGKYYESL | TRLEB**YVF | DGALDQSNEX  | YGFLEVVVKT  |
| Drme_AAF49892  | AYIAEMISSK | YFRPEIFLGD  | EKRFSENNDI | IRDNDIECRK | CLEGTFFLRK | PEIHIHPQGG | SL**SNSDSE | LPILSEKDNL | IKGANLTHEA | LKILESLDRD | KRNAVTSDEN | PILSAVNPV   | PLHDSRRDVF | DGEIDINSNY  | YGFLEIIVR*  |

TM

|                |            |            |            |            |            |            |            |             |            |           |            |             |            |            |            |
|----------------|------------|------------|------------|------------|------------|------------|------------|-------------|------------|-----------|------------|-------------|------------|------------|------------|
| Hosa NP_002829 | 901        | 911        | 921        | 931        | 941        | 951        | 961        | 971         | 981        | 991       | 1001       | 1011        | 1021       | 1031       | 1041       |
| Mumu_A28334    | *****      | *****      | *****      | *****      | *****      | *****      | *****      | *****       | *****      | *****     | *****      | *****       | *****      | *****      | *****      |
| Rano_TDR1LT    | *****      | *****      | *****      | *****      | *****      | *****      | *****      | *****       | *****      | *****     | *****      | *****       | *****      | *****      | *****      |
| Gaga_A54080    | *****      | *****      | *****      | *****      | *****      | *****      | *****      | *****       | *****      | *****     | *****      | *****       | *****      | *****      | *****      |
| Cyca_BAA92179  | *****      | *****      | *****      | *****      | *****      | *****      | *****      | *****       | *****      | *****     | *****      | *****       | *****      | *****      | *****      |
| Taru_CAB96212  | *****      | *****      | *****      | *****      | *****      | *****      | *****      | *****       | *****      | *****     | *****      | *****       | *****      | *****      | *****      |
| Hefr_T43148    | *****      | *****      | *****      | *****      | *****      | *****      | *****      | *****       | *****      | *****     | *****      | *****       | *****      | *****      | *****      |
| Lamprey        | *****      | *****      | *****      | *****      | *****      | *****      | *****      | *****       | *****      | *****     | *****      | *****       | *****      | *****      | *****      |
| Xela_AAA17990  | *****      | *****      | *****      | *****      | *****      | *****      | *****      | *****       | *****      | *****     | *****      | *****       | *****      | *****      | *****      |
| Dare NP_571963 | *****      | *****      | *****      | *****      | *****      | *****      | *****      | *****       | *****      | *****     | *****      | *****       | *****      | *****      | *****      |
| Rano_AAB28877  | *****      | *****      | *****      | *****      | *****      | *****      | *****      | *****       | *****      | *****     | *****      | *****       | *****      | *****      | *****      |
| Anga_EAA08408  | DSGNDGRDYL | STFSEYFQEM | NAGAPMEGDV | DGNDLSYILN | IVIQLLALI  | AVVVIVLM*V | LCFLHKHVSN | NIAQEGEAIS  | LQDSLRRALC | NGGRGVNVH | RHLLGSSSAK | PPVLPPIISKD | DLPKAYNDKH | KDSYGFQHE  | FELLPDKFAD |
| Drme_AAF49892  | ***DRNNAL  | MAYSKYFDII | TPATEAEPDQ | SLNNMDYIYS | IGVKAGAVLL | GVLVFIY*V  | WVFHKKTKN  | ELQGE*DTLIT | LRDLSLRALF | GRR***NNH | SHFTTSGNHK | GPDAGPIHRL  | DLENAYKNRH | KDTPDYGRLR | YEMLPNRFSD |

|                |            |            |            |            |            |            |            |            |            |            |            |            |            |            |             |
|----------------|------------|------------|------------|------------|------------|------------|------------|------------|------------|------------|------------|------------|------------|------------|-------------|
| Hosa NP_002829 | 1051       | 1061       | 1071       | 1081       | 1091       | 1101       | 1111       | 1121       | 1131       | 1141       | 1151       | 1161       | 1171       | 1181       | 1191        |
| Mumu_A28334    | *****      | *****      | *****      | *****      | *****      | *****      | *****      | *****      | *****      | *****      | *****      | *****      | *****      | *****      | *****       |
| Rano_TDR1LT    | *****      | *****      | *****      | *****      | *****      | *****      | *****      | *****      | *****      | *****      | *****      | *****      | *****      | *****      | *****       |
| Gaga_A54080    | *****      | *****      | *****      | *****      | *****      | *****      | *****      | *****      | *****      | *****      | *****      | *****      | *****      | *****      | *****       |
| Cyca_BAA92179  | *****      | *****      | *****      | *****      | *****      | *****      | *****      | *****      | *****      | *****      | *****      | *****      | *****      | *****      | *****       |
| Taru_CAB96212  | *****      | *****      | *****      | *****      | *****      | *****      | *****      | *****      | *****      | *****      | *****      | *****      | *****      | *****      | *****       |
| Hefr_T43148    | *****      | *****      | *****      | *****      | *****      | *****      | *****      | *****      | *****      | *****      | *****      | *****      | *****      | *****      | *****       |
| Lamprey        | *****      | *****      | *****      | *****      | *****      | *****      | *****      | *****      | *****      | *****      | *****      | *****      | *****      | *****      | *****       |
| Xela_AAA17990  | *****      | *****      | *****      | *****      | *****      | *****      | *****      | *****      | *****      | *****      | *****      | *****      | *****      | *****      | *****       |
| Dare NP_571963 | *****      | *****      | *****      | *****      | *****      | *****      | *****      | *****      | *****      | *****      | *****      | *****      | *****      | *****      | *****       |
| Rano_AAB28877  | *****      | *****      | *****      | *****      | *****      | *****      | *****      | *****      | *****      | *****      | *****      | *****      | *****      | *****      | *****       |
| Anga_EAA08408  | RRTKNSDMKE | NMPKNRYPDI | KAYDQTRVKL | TPNLGLAGSD | YINANFVIGY | KERKKFICAQ | GPMDAINDF  | WRMIWEQHLE | IIVMLTNELE | YNKTKCAQYW | PESTNDSIQY | GELLITFQSL | TYADYIIRT  | LKVTKRSASS | GEETS*R*EIS |
| Drme_AAF49892  | RRTKNSDLKE | NACKNRYPDI | KAYDQTRVKL | AVINGLQTTD | YINANFVIGY | KERKKFICAQ | GPMESTIDDF | WRMIWEQHLE | IIVMLTNELE | YNKTKCAQYW | PEKVFDTKQF | GDILVKAQOE | RKTGDYIERT | LNVSKNKANV | GEEDDRQIT   |
