# Supplementary material
Source: PubMed Central journal article supplement (PMC137888)
Supplement: pnas_212527699_8.pdf [file pnas_212527699_8.pdf]

|                        | E1         |            |            |            |            |            |            |            |            |            |             | TM         |            |             |            |
|------------------------|------------|------------|------------|------------|------------|------------|------------|------------|------------|------------|-------------|------------|------------|-------------|------------|
|                        | 1          | 11         | 21         | 31         | 41         | 51         | 61         | 71         | 81         | 91         | 101         | 111        | 121        | 131         |            |
| Rabbit AAA31391        | MAEEGSKRDS | IKMNMKGCQT | NNGFVQNEDI | PELDDLPSSS | *****KH    | ILG*PEEPN* | *****      | ***AKNIQPY | AQMPKEVLFQ | FAGQARYRVP | REILFVLLVVV | SVLVILGATI | AIIAISPCK* | ****LDWVQA  |            |
| Human NP_000332        | MAEDSKRDS  | IEMSMKGCQT | NNGFVHNEDI | LEQTPDPGSS | TDNLKHSTRG | ILG*SQEPD* | *****      | ***FKGVQPY | AGMPKEVLFQ | FAGQARYRIP | REILFVLLTVA | SVLVILGATI | AIIAISPCK* | ****LDWVQE  |            |
| Dog AF187966_1         | MAKGTDRRGS | GALRMQACRT | NNGFVQNGLI | PASEPEPEPE | PEPEPERARG | PASPPCPGG  | AAGLGLGLG  | GLGLGAAQPY | AGMPKEVLFQ | FERRARYRAP | REALFVLLTVA | SVLLLTGATI | AIIAISPCK* | ****LDWVQA  |            |
| Mouse NP_032321        | MDEDKGRKRS | IQMSMKGCRT | NNGFVQNDLI | PEQDPDPGSR | DTP*OPNAVS | IPA*PEEPH* | *****      | ***LKAVRPY | AGMPKEVLFQ | FAGQARYRVP | REILFVLLTVV | SVLLLIGATI | AIIAISPCK* | ****LDWVQA  |            |
| Rat NP_058912          | MNEDKDKRDS | IQMSMKGCRT | NNGFVQNDLI | QEQDPD**SR | DTP*QSNVS  | IPA*PEEPQ* | *****      | ***LKVVRPY | AGMPKEVLFQ | FAGQARYRVP | REILFVLLTVV | SVLLLIGATI | AIIAISPCK* | ****LDWVQA  |            |
| Human AAA51540         | *****      | ****MSQDT  | EVDMDKVELN | ELEPEKQPMN | ****AASGA  | AMSLAGAEKN | GLVKIKVAED | EAEAAPAKT  | TGLSKEELLK | VAGSGWVRT  | RWALLLLFWL  | GWLGMLAGAV | VIIVRAPCR  | ELPAQKWHT   |            |
| Mouse NP_032603        | *****      | ****MSQDT  | EVDMDKVELN | ELEPEKQPMN | ****AADGA  | AA***GEKN  | GLVKIKVAED | **ETEAGVKF | TGLSKEELLK | VAGSGWVRT  | RWALLLLFWL  | GWLGMLAGAV | VIIVRAPCR  | ELFVQRWWHK  |            |
| Rat NP_062156          | *****      | ****MSQDT  | EVDMDKVELN | ELEPEKQPMN | ****AADGA  | AA***GEKN  | GLVKIKVAED | **EAEAGVKF | TGLSKEELLK | VAGSGWVRT  | RWALLLLFWL  | GWLGMLAGAV | VIIVRAPCR  | ELFVQRWWHK  |            |
| Hamster AAB97631       | *****      | ****MSQDT  | EVDMDKVELN | ELEPEKQPMN | ****AAAGA  | AA***GEKN  | GLVKIKVAED | EAEAAGAKT  | TGLSKEELLK | VAGSGWVRT  | RWALLLLFWL  | GWLGMLAGAV | VIIVRAPCR  | ELFVQRWWHE  |            |
| Zebrafish NP_571676    | *****      | ****MANK   | EDEMKEVELN | EMDQKQPMT  | ****GTFPT  | GT***EKN   | GSVKV*LAGD | ****AEVKF  | TGLSKEELMK | VAGTAGWVRT | RWALLVFWL   | GWVGLAGAI  | VIIVQAPRCK | FIFEMHWNE   |            |
| Lamprey                | *****      | ***MADRDTV | SIDLKDELNR | DGSPPEQEQ  | QHRQEEEG   | DAEKLVMNTP | GDANGAAAKI | DDGASPAARF | TGLTKEELLK | ISTOPFWIRT | RLALLVFWL   | GWLAMLGAV  | VIIVQAPRCK | PEPRDWWQL   |            |
| Drosophila AAF59085    | *****      | *****      | *****      | *****      | *****      | *****      | *****      | *****      | *****      | *****MI    | KYRLIAFLAV  | IQYPNYHADP | VGICDHGAD* | ****LKWWQT  |            |
| Anopheles EAA00179     | *****      | *****      | *****      | *****      | *****      | *****      | *****      | *****      | *****      | *****      | **MALYYLAL  | LI*****    | LGWSTVTAQ* | ****KDWNES  |            |
| Anopheles EAA00998     | *****      | *****      | *****      | *****      | *****      | *****      | *****      | *****      | *****      | ***HFLFFPP | KMPPLGVLLL  | LVALGHSTQG | *****HR    | PLPIKKAHK*  | ****FDWBER |
| E.coli NP_290870       | *****      | *****      | *****      | *****      | *****      | *****      | *****      | *****      | *****      | *****      | *****       | *****M     | TNLS*      | *****HWQON  | ****KDWNES |
| S.pompe NP_595063      | *****      | *****      | *****      | *****      | *****      | *****      | *****      | *****      | *****      | *****      | *****       | *****M     | KVPSSEKIK* | *****PNIWRE | ****KDWNES |
| D. thermophilum P14899 | *****      | *****      | *****      | *****      | *****      | *****      | *****      | *****      | *****      | *****M     | KIKFFIKRTL  | IFIFILVTFP | TYHGYNEP*  | ****KYKN    | ****KDWNES |
| C.elegans NP_4970      | ****MDATDR | LMPGPEGKTP | RFYEVDRGNK | TESYISAVSG | NPVPEHIMR  | KEKRQEQEEA | PPQKSWERP  | APTNPKNTDQ | IGLSEQEEQ  | FRNDECKWFI | ETVLFVLEWL  | INLALFAVAI | LLVCSPTCV  | LRAKPNWQT   | ****KDWNES |

|                        | E2         |            |            |             |            | E3         |            |            |            |            |            |            |            |            |
|------------------------|------------|------------|------------|-------------|------------|------------|------------|------------|------------|------------|------------|------------|------------|------------|
|                        | 141        | 151        | 161        | 171         | 181        | 191        | 201        | 211        | 221        | 231        | 241        | 251        | 261        | 271        |
| Rabbit AAA31391        | GPMYQIYPRS | FKDSKDQNG  | DLKIQDKLD  | YITLNIKTI   | WITSFYKSSL | RDFRYGVDF  | REIDPIFGTM | EDFENLAAI  | HDKGLKLID  | FIPNHTSDKH | AWFQLSRT*R | TGKYTDYYIW | HDCAHENG*I | TTPNPNWLSV |
| Human NP_000332        | GPMYQIYPRS | FKDSKDQNG  | DLKIQDKLD  | YITLNIKTV   | WITSFYKSSL | KDFRYGVDF  | REVDPIFGTM | EDFENLVAAI | HDKGLKLID  | FIPNHTSDKH | INFQLSRT*R | TGKYTDYYIW | HDCTHENG*K | TIPPNNWLSV |
| Dog AF187966_1         | GPVIYIYPRS | FRSDADQNG  | DLKIQEKL   | YITLNIKTI   | WITSFYKSSL | KDFRYGIED  | RDIDPIFGTM | KDFENLAAI  | HDKGLKLID  | FIPNHTSDKH | AWFQLSRN*R | TGKYTDYYIW | HDCTHENG*T | TIPPNNWLSV |
| Mouse NP_032321        | GPIYIYPRS  | FKDSKDQNG  | DLKIQEKL   | YITLNIKTL   | WITSFYKSI  | EDFRYAVEDI | KEIDPIFGTM | KDFENLVAAI | HDKGLKLID  | FIPNHTSDKH | PWFQSSRT*R | SGKYTDYYIW | HNCTHANG*V | TTPNPNWLSV |
| Rat NP_058912          | GPMYQIYPRS | FKDSKDQNG  | DLKIQEKL   | YITLNIKTI   | WITSFYKSP  | KDFRYAVDF  | KEIDPIFGTM | KDFENLVAAV | HDKGLKLID  | FIPNHTSDKH | PWFQSSRT*R | SGKYTDYYIW | HNCTHANG*V | TTPNPNWLSV |
| Human AAA51540         | GALYRIGD** | LQAFVGRDAG | GIAGLKSHLE | YLSTLKVKGL  | VLGPIHKNQK | DEV**NTDL  | KQIDPDLGSQ | EDFKDLLQSA | KKKSIEHILD | LTPNYK*GQN | AWF*****   | *****      | *****      | *****      |
| Mouse NP_032603        | GALYRIGD** | LQAFVGRDAG | GIAGLKSHLE | YLSTLKVKGL  | VLGPIHKNQK | DEV**NTDL  | KQIDPDLGSQ | EDFKDLLQSA | KKKSIEHILD | LTPNYK*GQN | AWF*****   | *****      | *****      | *****      |
| Rat NP_062156          | GALYRIGD** | LQAFVGRDAG | GIAGLKSHLE | YLSTLKVKGL  | VLGPIHKNQK | DEV**NTDL  | KQIDPDLGSQ | EDFKDLLQSA | KKKSIEHILD | LTPNYK*GQN | AWF*****   | *****      | *****      | *****      |
| Hamster AAB97631       | GALYRIGD** | LQAFVGRDAG | GIAGLKSHLE | YLSTLKVKGL  | VLGPIHKNQK | DEV**NTDL  | KQIDPDLGSQ | EDFKDLLQSA | KKKSIEHILD | LTPNYK*GQN | AWF*****   | *****      | *****      | *****      |
| Zebrafish NP_571676    | GPLYQISNH* | LDAFVGRDAG | GLKSVVEEKL | YLSMLKLVKGL | VLGPIHKNQK | DEV**NTDL  | KQIDPDLGSQ | EDFKDLLQSA | KKKSIEHILD | LTPNYK*GQN | AWF*****   | *****      | *****      | *****      |
| Lamprey                | TAVYDVSTEA | FADNNGAGKG | DVRGVQRSLD | YLKQLNVRAM  | VMQLLPEDA  | TTR**QVNF  | INVDVRYGR  | DELQKLMTEA | RRKDIKILD  | MFAK****   | WF*****    | *****      | *****      | *****      |
| Drosophila AAF59085    | AIFYQIYPRS | FKDSNGDQVG | DLNGLAEQIP | YLKELGITAT  | WLSPIFTSPM | ADFGYDIANF | TEIAPIFGTM | ADFEELMVA  | KKLDIKILD  | FVFNHSSDEH | EWFRRSAA*R | DPEFKDFYVW | HPGRMENG*N | RHPPSNWISV |
| Anopheles EAA00179     | ASFYQIYPRS | FKDSNGDQVG | DLNGLAEQIP | YLKELGITAT  | WLSPIFTSPM | ADFGYDIANF | TEIAPIFGTM | ADFEELMVA  | KKLDIKILD  | FVFNHSSDEH | EWFRRSAA*R | DPEFKDFYVW | HPGRMENG*N | RHPPSNWISV |
| Anopheles EAA00998     | GNFYQIYPRS | FKDSNGDQVG | DLNGLAEQIP | YLKELGITAT  | WLSPIFTSPM | ADFGYDIANF | TEIAPIFGTM | ADFEELMVA  | KKLDIKILD  | FVFNHSSDEH | EWFRRSAA*R | DPEFKDFYVW | HPGRMENG*N | RHPPSNWISV |
| E.coli NP_290870       | GVYQIYPRS  | FKDSNGDQVG | DLNGLAEQIP | YLKELGITAT  | WLSPIFTSPM | ADFGYDIANF | TEIAPIFGTM | ADFEELMVA  | KKLDIKILD  | FVFNHSSDEH | EWFRRSAA*R | DPEFKDFYVW | HPGRMENG*N | RHPPSNWISV |
| S.pompe NP_595063      | GVYQIYPRS  | FKDSNGDQVG | DLNGLAEQIP | YLKELGITAT  | WLSPIFTSPM | ADFGYDIANF | TEIAPIFGTM | ADFEELMVA  | KKLDIKILD  | FVFNHSSDEH | EWFRRSAA*R | DPEFKDFYVW | HPGRMENG*N | RHPPSNWISV |
| D. thermophilum P14899 | AIFYEVFVRS | FADSDGDQVG | DLNGLAEQIP | YLKELGITAT  | WLSPIFTSPM | ADFGYDIANF | TEIAPIFGTM | ADFEELMVA  | KKLDIKILD  | FVFNHSSDEH | EWFRRSAA*R | DPEFKDFYVW | HPGRMENG*N | RHPPSNWISV |
| C.elegans NP_4970      | AVAYHWVPS  | FKDSNGDQVG | DVDGLNRLD  | QLRKSQVQT   | WSPFLIS*D  | DEKT*AVRS  | SQMDPKIGVN | QKADLNLKI  | HEKGNPKSAV | *****      | *****      | *****      | *****      | *****      |

|                        | E4         |            |            |            |            | E5         |            |            |            |            | E6          |            |            |            |            |          |
|------------------------|------------|------------|------------|------------|------------|------------|------------|------------|------------|------------|-------------|------------|------------|------------|------------|----------|
|                        | 281        | 291        | 301        | 311        | 321        | 331        | 341        | 351        | 361        | 371        | 381         | 391        | 401        | 411        |            |          |
| Rabbit AAA31391        | YGNSSWHFDE | VRNQCYPHQF | LKEQPDNLNR | NPVQEEIKE  | IMQFWLTKGV | DGFSFNAVKF | LLEAMHLRNE | IQVNAS***Q | IPDVTTRYSE | LYHDFTTQV  | GMHDLVRSFR  | QTMQYRSFEP | GRYRFMGTEA | YAESIDRTMR |            |          |
| Human NP_000332        | YGNSSWHFDE | VRNQCYPHQF | MKEQPDNLNR | NPVQEEIKE  | IIRFWLTKGV | DGFSFDAVKF | LLEAKHLRDE | IQVNT***Q  | IPDVTQYSE  | LYHDFTTQV  | GMHDVRSFR   | QTMQYRSFEP | GRYRFMGTEA | YAESIDRTVM |            |          |
| Dog AF187966_1         | YGNSSWHFDE | VRNQCYPHQF | LREQPDNLFR | NLDVQEEIKE | IITFWLTKGV | DGFSFDAVKF | LLEAEHLRDE | AQVNA***Q  | IPDVTTHYSE | LYHDFTTQV  | GMHDVRSFR   | QTMQYRSFEP | GRYRFMGTEA | YAESIDRTMM |            |          |
| Mouse NP_032321        | YGNSSWHFDE | VRNQCYPHQF | LREQPDNLFR | NPVQEEIKE  | IITFWLTKGV | DGFSFDAVKF | LLEAKDLRNE | IQVNT***Q  | IPDVTTRYSE | LYHDFTTQV  | GMHDLVRSFR  | QTMQYRSFEP | GRYRFMGTEA | YAESIDRTMM |            |          |
| Rat NP_058912          | YGNSSWHFDE | VRNQCYPHQF | LREQPDNLFR | NPVQEEIKE  | IITFWLTKGV | DGFSFDAVKF | LLEAKDLRNE | IQVNT***Q  | IPDVTTRYSE | LYHDFTTQV  | GMHDLVRSFR  | QTMQYRSFEP | GRYRFMGTEA | YAESIDRTMM |            |          |
| Human AAA51540         | *****      | *****      | *****      | ****S*Q    | VDIVATKVKD | ALFPWLQAGV | DGQV****   | *****      | *****      | *****      | ***RDIENLK  | DASSFLAEWQ | NITKGFSEDT | ***RLIAGT  | NSSDLQQLS  |          |
| Mouse NP_032603        | *****      | *****      | *****      | ****LPAQ   | ADIVATKIKE | ALSSWLQDGV | DGQV****   | *****      | *****      | *****      | ***RDVGEKLM | NAPLYLAEWQ | NITKNFSEDT | ***RLIAGT  | ESSDLQQLVN |          |
| Rat NP_062156          | *****      | *****      | *****      | ****LPPQ   | ADIVATKIKE | ALSSWLQDGV | DGQV****   | *****      | *****      | *****      | ***RDVGEKLM | NAPLYLAEWQ | NITKNFSEDT | ***RLIAGT  | ASSDLQQLVN |          |
| Hamster AAB97631       | *****      | *****      | *****      | ****LPAQ   | ADIVATKIKE | ALSSWLQDGV | DGQV****   | *****      | *****      | *****      | ***RDVGEKLM | NAPLYLAEWQ | NITKNFSEDT | ***RLIAGT  | DSSDLQQLVT |          |
| Zebrafish NP_571676    | *****      | *****      | *****      | ****NNA    | AS*VAEKLIK | ACVFWLKNQV | DGIFL****  | *****      | *****      | *****      | ***SDINDIM  | NLYAWSIQQA | IFNKIDGFP* | ***KCALMGT | ASSLSVDTIS |          |
| Lamprey                | *****      | *****      | ***SNGTSG  | TKMREBMKK  | ALKFWMQGI  | AGFRIG***  | *****      | *****      | *****      | *****      | ***VGLGEKE  | EVNDLFEWHR | NVTSTYSTED | KERRVLIADA | RQSDLAEYL  |          |
| Drosophila AAF59085    | FRGSAWQWHD | GRQEFYHQF  | VKKQPDNLNR | NPKVRETNEN | VLRFWLTKGV | AGFRIDAVPH | VFEIAPDNQV | QYRDEPRND  | DND*PEDYGV | LQHIYTKDQF | ETIDLVYENR  | AVLDAHQRH  | GGEDRILMAE | TYSPIDIVMQ |            |          |
| Anopheles EAA00179     | FRGSAWQWHD | GRQEFYHQF  | VKKQPDNLNR | NPKVRETNEN | VLRFWLTKGV | AGFRIDAVPH | VFEIAPDNQV | QYRDEPRND  | DND*PEDYGV | LQHIYTKDQF | ETIDLVYENR  | AVLDAHQRH  | GGEDRILMAE | TYSPIDIVMQ |            |          |
| Anopheles EAA00998     | FRGSAWQWHD | GRQEFYHQF  | VKKQPDNLNR | NPKVRETNEN | VLRFWLTKGV | AGFRIDAVPH | VFEIAPDNQV | QYRDEPRND  | DND*PEDYGV | LQHIYTKDQF | ETIDLVYENR  | AVLDAHQRH  | GGEDRILMAE | TYSPIDIVMQ |            |          |
| E.coli NP_290870       | FRGSAWQWHD | GRQEFYHQF  | VKKQPDNLNR | NPKVRETNEN | VLRFWLTKGV | AGFRIDAVPH | VFEIAPDNQV | QYRDEPRND  | DND*PEDYGV | LQHIYTKDQF | ETIDLVYENR  | AVLDAHQRH  | GGEDRILMAE | TYSPIDIVMQ |            |          |
| S.pompe NP_595063      | FDTSAWRWA  | ESEQYLLHLF | AVEQADLNWE | NPVRAEKLK  | VCFPWARDRG | DGLRLDVVNL | ISKDPFPDD  | LGDGGR***  | ***RFYTDGP | RAHEFHEMN  | RDVTFPRGLM  | TVGEMG*STS | LHQRQYAL   | TGSELSMTFN |            |          |
| D. thermophilum P14899 | ****SNLWYK | KPTQYYYALF | WSEMPDLNFD | NPKVRETNEN | VLRFWLTKGV | AGFRIDAVPH | VFEIAPDNQV | QYRDEPRND  | DND*PEDYGV | LQHIYTKDQF | ETIDLVYENR  | AVLDAHQRH  | GGEDRILMAE | TYSPIDIVMQ |            |          |
| C.elegans NP_4970      | *****      | *****      | *****      | ****LNWQ   | NSNLREHMFN | ALSNWIDRGV | DGFEHQIEY  | LARTPN***  | *****      | *****      | *****GTE    | PWNSIYDVI  | RDIRFHVDSY | SNESITADGK | KIALPSTREE | AKKPKKMA |

Rabbit AAA31391 421 431 441 451 461 471 481 491 501 511 521 531 541 551  
Human NP\_000332 YYGLSFIQEQ ADFPFNN\*\* YFTTLDLTSG NTVYE\*VITA WMENMP\*\*E GKWPNNMTGG PDITRLTSLR GNQ\*YVNMIM \*MLLFTLPGT PITIYGEIIG MGN\*\*\*\*\*  
Dog AF187966\_1 YYGLPFQIQE ADFPFNN\*\* YLSMLDTVSG NSVYE\*VITS WMENMP\*\*E GKWPNNMTGG PDSSRLTSLR GNQ\*YVNMIM \*MLLFTLPGT PITIYGEIIG MGN\*\*\*\*\*  
Mouse NP\_033231 YYGLPFQIQE ADFPFNN\*\* YLTKLNTPSG NSVFE\*VITS WMENMP\*\*E GKWPNNMTGG PDNARLTSRF GEE\*YVNMIM \*MLVFTLPGT PITIYGEIIG MGN\*\*\*\*\*  
Rat NP\_058912 YYGLSFIQEQ ADFPFNN\*\* YFTTIGLTSG HTVYE\*VITS WMENMP\*\*E GKWPNNMTGG PETPRLTSLR GSE\*YVNMIM \*MLLFTLPGT PITIYGEIIG MGN\*\*\*\*\*  
Human AAA51540 LLESNKDLLL TSS\*\*\*\*\* YLSDG\*STG E\*\*HTKSLVT QYLNAT\*\*G NRWCWSLSQ \*\*\*ARLTSF LPAQLLRLYQ \*LMFTLPGT PVFVSGDEIG LDAA\*\*\*\*\*  
Mouse NP\_032603 ILESTSDLLL TSS\*\*\*\*\* YLSNST\*FTG E\*\*RTESLVT RFLNAT\*\*G SQWCSWSVSQ \*\*\*AGLLADF IPDHLRLYQ \*LLFTLPGT PVFVSGDEIG LQG\*\*\*\*\*  
Rat NP\_062156 ILESTSDLLL TSS\*\*\*\*\* YLSQPV\*FTG E\*\*HALLVI KFLNAT\*\*G SRWCWSVSQ \*\*\*AGLLTSF IPAQFLRLYQ \*LLFTLPGT PVFVSGDEIG LQAV\*\*\*\*\*  
Hamster AAB97631 ILESTSDLLL TSS\*\*\*\*\* YLSNST\*FTG E\*\*HTKSLVT RFLNAT\*\*G SHWCWSVSQ \*\*\*AGLLTAS VPAQLLRLYQ \*LMFTLPGT PVFVSGDEIG LQEA\*\*\*\*\*  
Zebrafish NP\_571676 LLLNQSGVDL LLT\*\*\*\*\* KLPYP\*GLS G\*\*RQATLMQ RLCGSH\*\*G EASLAWLGG T\*\*AGSOAR TPALPVKLYQ \*TLLFALPGT PVFVSGDEIG LKA\*\*\*\*\*  
Lamprey VEGNADLTV VYD\*\*\*\*\* LRKLSANSTE T\*\*DVHNLVK SILMK\*\*A NKSIGLAIGG R\*\*NGYLATK NPG\*LNRLALG \*VLLLTLPGT PFIYGEIIG LRF\*\*\*\*\*  
Drosophila AAF59085 YYGN\*ATAEG AQLPFNFLLI SELSNSNAH A\*\*YEGTVLK WQHMP\*\*K GRTANWVLGN HDQPRVGRSL GRD\*RVDMLN \*MLTATLPGA SVTVOGEIIG MTN\*\*\*\*\*  
Anopheles EAA00179 YFNDNNRQG SQMPFNFQLI MELDNNSKAS D\*\*FQTVINS WDIIP\*\*P GHTPNWVLGN HDKRRVSSRM GGDHMDVIMA \*MIELTLPGI TVTVOGEIIG MHD\*\*\*\*\*  
Anopheles EAA00998 FYGT\*PAARQ AQIPFNFQLI TLLTVNSTGR D\*\*FNAVQS WTRAMP\*\*S GAICANWVLGN HDNSRIASRL GVA\*RADLYN \*IALQTLPGI AVTVOGEIIG MVD\*\*\*\*\*  
E.coli NP\_290870 FHLKLV\*YYP FGEKWDLAKP DFVALTKLFR H\*\*WQOQGMH \*\*VALNA\*\*L FCWNHDQPRV VSRF\*DEGE YRVPAAKMLA \*MVLHGMQGT PFIYGEIIG MTN\*PHFTRI TDYRDVESLN MFALRNDG\* \*\*RDADELLA  
S.pompe NP\_595063 FDFVDLDDP NQHKYIRGSW ELSDLKSLK K\*\*WQSALLS GGGWNA\*\*S FIENHDQTRT VSRYLSDSFK YRAYSSKMLA \*LFIIFQSGT PFIYGEIIG LANIPRDWPI DEYLDVETQN FWKLFMSGNP SQEIEKTM  
D. thermophilum P14899 YKGLPSNPNF PLS\*\*DKIMN SSSKSKRLRN Y\*\*RISRLKR LFGENN\*\*T DFADAIFLRN HDQVRVTRTF GGSIDKSLA GSIYVTLACN TFIYGEIIG MEG\*\*\*\*\*  
C.elegans NP\_4970 KSGMDTVINY ELGEVEKDTK ICHKNEGSVA T\*\*CVHEILS DVLLFHSLNE QVWPHWRVFS PDLARIASRV GSRPHAQLLM \*VLQMLPGT NNIIYGEIIG MRN\*\*\*\*\*

Rabbit AAA31391 561 571 581 591 601 611 621 631 641 651 661 671 681 691  
Human NP\_000332 ESYDVNTLLS KSPMNDNS NAGFSEGN\*H TWLPTSSDYH TYNVDVOKIQ \*PTSALKLYQ ALSLHANEL FCLLRNDSRV LVYTRELDGI DR\*\*\*\*\*  
Dog AF187966\_1 ESYDVNTLLS KSPMNDNS NAGFSEAN\*H TWLPTSSDYH TYNVDVOKIQ \*PRAALKLYQ DLSLHANEL FCHLRNDSHY VVYTRELDGI DR\*\*\*\*\*  
Mouse NP\_033231 ESYDSTLLVS KSPMNDNS NAGFTEAN\*H TWLPPNSDYH TYNVDVOKIQ \*SRSAKLYQ ELSLHANEL \*\*\*LLSRGW FCYLRNDSHS VVYARELDGI DR\*\*\*\*\*  
Rat NP\_058912 ERYDTNALLS KSPMNDNS NAGFTEAN\*H TWLPTNSDYH TYNVDVOKIQ \*PSSAALRYQ DLSLHANEL \*\*\*VLSRGW FCLLRDSDHS VVYTRELDGI DN\*\*\*\*\*  
Human AAA51540 \*\*ALPGQPM E APVMLDESS FPDIPGAV\*\* \*\*\*\*\*S AMTVKGQSE DPGSLSTQFR RLSDRGKER \*\*\*SLLHGD FHAFSAGPGL FSYIRHWON ER\*\*\*\*\*  
Mouse NP\_032603 \*\*ALPGQPAK APMLPWNES IPHIPPV\*\* \*\*\*\*\*S LNMTVKQNE DPGSLTQFR RLSDRGKER \*\*\*SLLHGD FHALLSSPDL FSYIRHWON ER\*\*\*\*\*  
Rat NP\_062156 \*\*ALPGQPM E APFMLWNES NSQTSSPV\*\* \*\*\*\*\*S LNMTVKQNE DPGSLTQFR RLSDRGKER \*\*\*SLLHGD FHALSSSEL FSYIRHWON ER\*\*\*\*\*  
Hamster AAB97631 \*\*VVPQVE APFMPDESS LPQTPGHI\*\* \*\*\*\*\*S TNMTVKQNE DPGSLTQFR WLSDRGKER GKERSLHGD FRALTSSPEI FSYVRYWON ER\*\*\*\*\*  
Zebrafish NP\_571676 \*\*\*\*\*S \*GAMNED\*\* \*\*\*\*\*S VNSTAE\*\*E ENTAVRNFKL TSLDLKGER \*\*\*SLLHGE YVNLHNSPTS LAFRLNDQS ER\*\*\*\*\*  
Lamprey \*\*GAET\*\* \*\*MPVNDSS \*\*\*\*\*S IVNVKSOETH KHSNLLYR NLAKLKWS S \*\*\*AKFGD FNFTLIGGV FAFQLVQDS PR\*\*\*\*\*  
Drosophila AAF59085 IYEQYSDPE RTPFQWDAQ DAGFSNAS\*K TWLPIAVDYK EYNVE\*QERQ KPLSHNLVYR QIWOIRKQSQ \*\*\*TLKRGE TEVKALSDAV LAVKRWLQVA QFYQIYPRSY KSDSDGIGD LQGIISKLDY LKEIGVATW  
Anopheles EAA00179 TYQEGTRDPA RTPFQWDSTA NAGFTNASVK PWLPLATDYP LVNVITQES AQNSHIKVFK ELMNLRG\*TN \*\*\*TLIWS EKSLVGRD YAILRSFND K\*\*\*\*\*  
Anopheles EAA00998 TYELYSRDPV RTPFQWNGT NAGFSNAS\*V TWLPVADGYR ELNVA\*AQLA APRSHKTFM QLTAYRKR\*Q \*\*\*LLAEGN FDLRTVGRDL VMYKRSVPV GY\*\*\*\*\*  
E.coli NP\_290870 ILASKSRDNS RTPMOWNSGD NAGFTAG\*\*E PWIGLGDNYR QINVEAALAD ESSEVFTYQK LIALRKR\*BA \*\*\*LLTWN YQDLTPNSPV LWCYRREWK QT\*\*\*\*\*  
S.pompe NP\_595063 IVNKRARDNG RTPMHWDS P NGGFTKAGVK PWRMVNDYK EWNANQVND PESPYTFWSK ALELRKELKD \*\*\*AVVYGS BELISEDPS IVAFVRESST YK\*\*\*\*\*  
D. thermophilum P14899 \*\*\*SKPDEYI REPFKWTDDM KSKYQTYWII P\*\*RY\*NLP NGIALDTBEK DPNSIYNHK KLEIRVKCR \*\*\*ALNGK IERIKTQDRS ILAYKLEED EK\*\*\*\*\*  
C.elegans NP\_4970 LANDSRVFPQ KGAMQWDSL NGGFTSAISP P\*\*VPSNIDV ANINWKRQYA EPQSTLKIFA KLAKLRQED \*\*\*ALMTGT TLIGRLVDA FTRTRFNNEF NRTTG\*\*\*\*

Rabbit AAA31391 701 711 721 731 741 751 761 771 781 791 801 811 821 831  
Human NP\_000332 VLNFGES\*\* \*\*\*\*\*S \*TLLNLQEMI SGLPVRLSIK LSTNSASTGS QVDTRGIFLE RGEGLVLEHK MKNLLHRQTA FRDRCFISSR \*\*\*\*\*  
Dog AF187966\_1 VLNFGES\*\* \*\*\*\*\*S \*TLLNLHMI SGLPAKIRIR LSTNSAD\*GS JVDTSIGIFLD KGEGLIFEHN TKNLLHRQTA FRDRCFVSNR \*\*\*\*\*  
Mouse NP\_033231 VLNFGES\*\* \*\*\*\*\*S \*SLVNLQEMI SNIPARMRIR LSTNSADDRN TVDTNAILLD KGEGLI EYN TNDLLHQTA FKDRCFVSNR \*\*\*\*\*  
Rat NP\_058912 VLNFGES\*\* \*\*\*\*\*S \*TVLNLQEI SDLPPELRIR LSTNSAS\*GS AVDTRAISLE KGEGLVLEHS TKAPLHQQA FRDRCFVSSR \*\*\*\*\*  
Human AAA51540 VLNFGES\*\* \*\*\*\*\*S \*TVLNLQETI SDVPTKLRIR LSTNPAS\*GS DVDTHAVSLE KGEGLI EHS MKTLLHQKA FRDKCFISNR \*\*\*\*\*  
Mouse NP\_032603 VLNFRD\*\* \*\*\*\*\*S \*\*\*\*\*S GLSAGLQASD \*LPASASLPA KADLLSTQP GR\*\*EEGSP LEERLKELE \*\*\*\*\*  
Rat NP\_062156 VLNFDV\*\* \*\*\*\*\*S \*\*\*\*\*S GRSARLGASN \*LPAGISLPA SAKLLS TDS ARQREEDTS LKLENLSNP \*\*\*\*\*  
Hamster AAB97631 VLNFDV\*\* \*\*\*\*\*S \*\*\*\*\*S GLSARV GASN \*LPAGISLPA SANLLS TDS TRLSREEDTS LSENLSNP \*\*\*\*\*  
Zebrafish NP\_571676 AVNWCD\*\* \*\*\*\*\*S \*\*\*\*\*S VLSARLEAAN \*LPAGISLPA SANLLFSTNS TRLQGEQGS LSENLYNP \*\*\*\*\*  
Lamprey LFNLGS\*\* \*\*\*\*\*S \*\*\*\*\*S SISMTLND \*LPPEAR\*RA TTDIEKLA\*\* \*\*\*\*\*VDSK VKLEKLEGS \*\*\*\*\*  
Drosophila AAF59085 LSPYSSPMA DFGYDISDF DIQPEYGTLA DFDELIAEAK KRNIKIILDF VPHNSDENV WFQSKVREK GYEDYYMWD GYVNTATGKR EPPSNWLQAF RGSAWEWNDE RQYYLHQFA VKQPDNLNRYN PAVVAQMKRV  
Anopheles EAA00179 LANICSK\*\* \*\*\*\*\*S \*\*SEIIDATK \*\*\*\*\*S LDNSLPNELV FRVSVS\*\* \*\*\*\*\*S \*\*NHITGS VATNNILNP \*\*\*\*\*  
Anopheles EAA00998 ALNFGPE\*\* \*\*\*\*\*S \*\*\*\*\*S VASQFPGTGE HWLKVIAS\*\* \*\*\*\*\*S \*\*SLQAO PQAGTWLNR \*\*\*\*\*  
E.coli NP\_290870 IANLSRE\*\* \*\*\*\*\*S \*\*\*\*\*S I\*\*PWQPGQMRG NWQLVMHN\*\* \*\*\*\*\*S \*\*\*\*\*S YEAS PQPCAMTRP \*\*\*\*\*  
S.pompe NP\_595063 LLNFTGM\*\* \*\*\*\*\*S \*\*\*\*\*S VSYDCPLNLT SYEILLDN\*\* \*\*\*\*\*S \*\*\*\*\*S YKDFI CMT\*PVTLP \*\*\*\*\*  
D. thermophilum P14899 VHNLNRIEN \*\*\*\*\*S \*\*\*\*\*S \*\*TFNFNNEIK EKDILYIR\*\* \*\*\*\*\*S \*\*\*\*\*S \*\*NAK TEKN\*IIIGP \*\*\*\*\*  
C.elegans NP\_4970 ALNFAEHP\*\* \*\*\*\*\*S \*\*\*\*\*S LPLTDLPSNS KLHKSTIITA TSNCAVYAR \*\*\*\*\*S \*\*\*\*\*S QTVD FGLKEIELEP \*\*\*\*\*

|                               | 841        | 851        | 861           | 871 |
|-------------------------------|------------|------------|---------------|-----|
| Rabbit AAA31391               | *****      | *****      | YSSALDILYS    | SC  |
| Human NP_000332               | *****      | *****      | AC YSSVLNILYT | SC  |
| Dog AF187966_1                | *****      | *****      | AC YSSVLNILHS | LC  |
| Mouse NP_033231               | *****      | *****      | AC YSSALDILYS | SC  |
| Rat NP_058912                 | *****      | *****      | AC YSSVLDLLYS | SC  |
| Human AAA51540                | *****      | *****      | HEGILLRFPY    | AA  |
| Mouse NP_032603               | *****      | *****      | YEGLLQFFP     | VA  |
| Rat NP_062156                 | *****      | *****      | YEGLLQFFP     | VA  |
| Hamster AAB97631              | *****      | *****      | HEGILLHFPY    | VA  |
| Zebrafish NP_571676           | *****      | *****      | KQAVLSVFP     | PG  |
| Lamprey                       | *****      | *****      | MEALVLKIN     | VA  |
| <i>Drosophila</i> AAF59085    | LTYWLDRGVA | GFRMDAVPWC | FEVLPDADGR    | YP  |
| <i>Anopheles</i> EAA00179     | *****      | *****      | YKAVLAN**     | **  |
| <i>Anopheles</i> EAA00998     | *****      | *****      | L YKLAPDSG**  | **  |
| <i>E. coli</i> NP_290870      | *****      | *****      | FEAVWVLQK*    | **  |
| <i>S. pompe</i> NP_595063     | *****      | *****      | YQAVLKL*      | **  |
| <i>D. thermophilum</i> P14899 | *****      | *****      | YSTVIVKIP*    | **  |
| <i>C. elegans</i> NP_4970     | *****      | *****      | NEGVFRTSA     | **  |
