# Supplementary material
Source: PubMed Central journal article supplement (PMC137888)

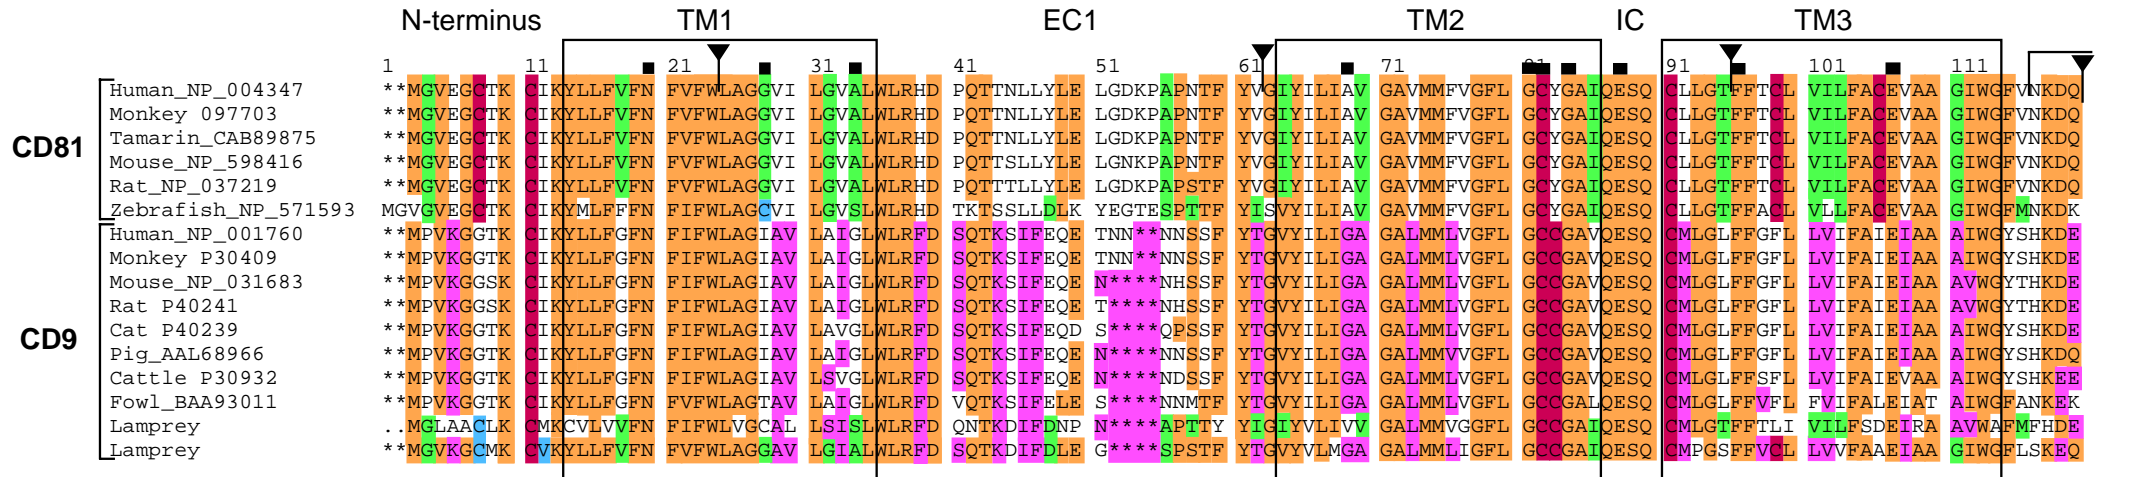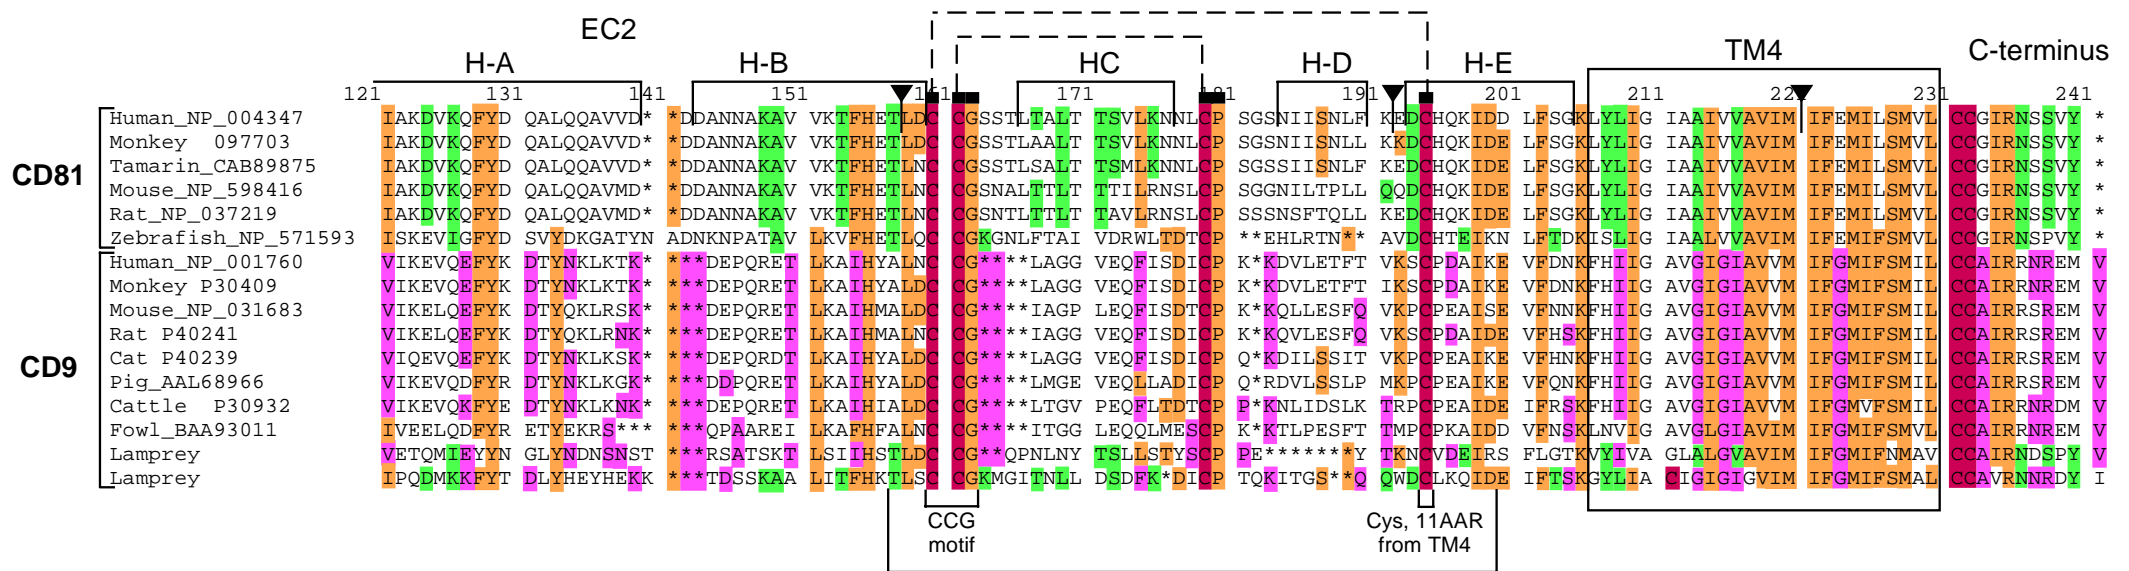

Region involved in association with diphtheria toxin receptor (DTR)

Supplement: pnas_212527699_7.pdf [file pnas_212527699_7.pdf]
